# Supplementary material for: Protecting against brain damage by improving treatment in neonates with hypoglycaemia: ProBrain-D—a study protocol of a prospective longitudinal study
Source: HighWire-hosted journal article supplement (doi:10.1136/bmjopen-2022-063009), 2022-08-01
Supplement: bmjopen-2022-063009supp002_data_supplement.pdf [file bmjopen-2022-063009supp002_data_supplement.pdf]

## Survey Breastfeeding/Nutritional intake – ProBrain-D Study

### Age 4-6 weeks:

Pseudonymization number: \_\_\_\_\_ Date of phone call: \_\_\_\_\_

Current weight of the baby (kg): \_\_\_\_\_ Current length of the baby (cm): \_\_\_\_\_

#### 1. How is the baby currently nourished?

- |                                                                                                 |                                                                               |
|-------------------------------------------------------------------------------------------------|-------------------------------------------------------------------------------|
| <input type="checkbox"/> Exclusively breastfed*<br>(without formula, water, tea etc.)           | <input type="checkbox"/> Partially breastfed*<br>(with formula and water/tea) |
| <input type="checkbox"/> Exclusively breastfed*<br>(without formula, but with water and/or tea) | <input type="checkbox"/> Not breastfed*<br>(only formula and water/tea)       |

\* breastfeeding = feeding with breast milk, this also includes pumped breast milk given by bottle

#### If breastfeeding is only partially done or not done at all, give reasons for this. (Multiple answers possible)

- |                                                                             |                                                                         |
|-----------------------------------------------------------------------------|-------------------------------------------------------------------------|
| <input type="checkbox"/> Mother doesn't want or is not able to breastfeed   | <input type="checkbox"/> Baby drank poorly                              |
| <input type="checkbox"/> Baby did not get enough breastmilk                 | <input type="checkbox"/> Baby lost weight                               |
| <input type="checkbox"/> For time reasons                                   | <input type="checkbox"/> Health problems of the baby                    |
| <input type="checkbox"/> Baby refused the breast                            | <input type="checkbox"/> Health problems of the mother                  |
| <input type="checkbox"/> Mother finds bottle feeding better/more convenient | <input type="checkbox"/> Medication intake of the mother                |
| <input type="checkbox"/> Mother wants to go back to work                    | <input type="checkbox"/> Lack of knowledge/guidance on breastfeeding    |
| <input type="checkbox"/> Due to advise from a midwife                       | <input type="checkbox"/> Due to advise from a pediatrician/gynecologist |
| <input type="checkbox"/> Other reasons: _____                               |                                                                         |

#### 2. Have there been any breastfeeding problems in the last 6 weeks? Yes (please specify) No

- |                                                  |                                                             |
|--------------------------------------------------|-------------------------------------------------------------|
| <input type="checkbox"/> Soar nipples            | <input type="checkbox"/> Baby had problems drinking/sucking |
| <input type="checkbox"/> Breast engorgement      | <input type="checkbox"/> Baby was too tired to drink        |
| <input type="checkbox"/> Mastitis                | <input type="checkbox"/> Not enough breast milk             |
| <input type="checkbox"/> Baby refused the breast | <input type="checkbox"/> Other breastfeeding problems       |

Other breastfeeding problems: \_\_\_\_\_

**If breastfeeding problems were experienced, do you see them as being related to supplemental feeding/management of postnatal hypoglycaemia?**

Yes  No

---

**3. Have you ever pumped breast milk since your baby was born?**

Yes, only at the beginning/occasionally  Yes, regularly  No

If yes, please give reasons?

---

---

---

**4. Were you supported by a midwife after discharge from the hospital?**  Yes  No

**If yes, how often and over what time period did the midwife visit you?**

(e.g., 3x/week over 4 weeks) \_\_\_\_\_

**5. How satisfied were you with the assistance/guidance on breastfeeding provided by the nurses and midwives of the University Hospital Düsseldorf?**

Very satisfied  Rather satisfied  Neither satisfied nor unsatisfied  
 Rather unsatisfied  Very unsatisfied

What could be improved? Further comments:

---

---

## Survey Breastfeeding/Nutritional intake – ProBrain-D Study

### Age 6 months:

Pseudonymization number: \_\_\_\_\_ Date of phone call: \_\_\_\_\_

Current weight of the baby (kg): \_\_\_\_\_ Current length of the baby (cm): \_\_\_\_\_

#### 1. How is the baby currently nourished?

- |                                                                                                                                                                   |                                                                                                                 |
|-------------------------------------------------------------------------------------------------------------------------------------------------------------------|-----------------------------------------------------------------------------------------------------------------|
| <input type="checkbox"/> <b>Exclusively breastfed*</b><br><i>(without formula, water, tea and without complementary food like mashed vegetables, fruits etc.)</i> | <input type="checkbox"/> <b>Partially breastfed*</b><br><i>(with formula, complementary food and water/tea)</i> |
| <input type="checkbox"/> <b>Exclusively breastfed*</b><br><i>(without formula and complementary food but with water/tea)</i>                                      | <input type="checkbox"/> <b>Not breastfed*</b><br><i>(only formula, complementary food and water/tea)</i>       |

\* breastfeeding = feeding with breast milk, this also includes pumped breast milk given by bottle

#### 2. Until which month of life was your baby exclusively breastfed?

Month of life: \_\_\_\_\_

The baby was never exclusively breastfed

#### If breastfeeding was only partially done or not done at all, give reasons for this. (Multiple answers possible)

- |                                                                             |                                                                      |
|-----------------------------------------------------------------------------|----------------------------------------------------------------------|
| <input type="checkbox"/> Mother doesn't want or is not able to breastfeed   | <input type="checkbox"/> Baby drank poorly                           |
| <input type="checkbox"/> Baby did not get enough breastmilk                 | <input type="checkbox"/> Baby lost weight                            |
| <input type="checkbox"/> For time reasons                                   | <input type="checkbox"/> Health problems of the baby                 |
| <input type="checkbox"/> Baby refused the breast                            | <input type="checkbox"/> Health problems of the mother               |
| <input type="checkbox"/> Mother finds bottle feeding better/more convenient | <input type="checkbox"/> Medication intake of the mother             |
| <input type="checkbox"/> Mother wants to go back to work                    | <input type="checkbox"/> Lack of knowledge/guidance on breastfeeding |
| <input type="checkbox"/> Regular introduction of complementary feeding      |                                                                      |
| <input type="checkbox"/> Other reasons: _____                               |                                                                      |

**3. Have there been any breastfeeding problems in the last 6 months?**  Yes (*please specify*)  No

- |                                                  |                                                             |
|--------------------------------------------------|-------------------------------------------------------------|
| <input type="checkbox"/> Soar nipples            | <input type="checkbox"/> Baby had problems drinking/sucking |
| <input type="checkbox"/> Breast engorgement      | <input type="checkbox"/> Baby was too tired to drink        |
| <input type="checkbox"/> Mastitis                | <input type="checkbox"/> Not enough breast milk             |
| <input type="checkbox"/> Baby refused the breast | <input type="checkbox"/> Other breastfeeding problems       |

Other breastfeeding problems: \_\_\_\_\_

\_\_\_\_\_

**If breastfeeding problems were experienced, do you see them as being related to supplemental feeding/management of postnatal hypoglycaemia?**

- Yes  No

\_\_\_\_\_

**4. When did the baby first receive the following foods?**

|                                                                                                          | Months of life: | Not received             |
|----------------------------------------------------------------------------------------------------------|-----------------|--------------------------|
| <input type="checkbox"/> Fluids ( <i>water, tea, juice</i> )                                             | (    )          | <input type="checkbox"/> |
| <input type="checkbox"/> Cow's milk                                                                      | (    )          | <input type="checkbox"/> |
| <input type="checkbox"/> Formula                                                                         | (    )          | <input type="checkbox"/> |
| <input type="checkbox"/> Complementary food<br>( <i>mashed vegetables, fruits, bread, cookie etc. </i> ) | (    )          | <input type="checkbox"/> |
| <input type="checkbox"/> Foods containing gluten<br>( <i>cereals, bread, cookies etc.</i> )              | (    )          | <input type="checkbox"/> |
