# Supplementary material for: Protecting against brain damage by improving treatment in neonates with hypoglycaemia: ProBrain-D—a study protocol of a prospective longitudinal study
Source: HighWire-hosted journal article supplement (doi:10.1136/bmjopen-2022-063009), 2022-08-01
Supplement: bmjopen-2022-063009supp003_data_supplement.pdf [file bmjopen-2022-063009supp003_data_supplement.pdf]

ProBrain-D

Pseudonym: \_\_\_\_\_

Survey Developmental Milestones – ProBrain-D Study**Age 6 Months**

Date of phone call: \_\_\_\_\_ Age of the patient in months: \_\_\_\_\_

|                                                                                                                                                                                                                                                                                                                                                                                                                                 | Task fulfilled |    |
|---------------------------------------------------------------------------------------------------------------------------------------------------------------------------------------------------------------------------------------------------------------------------------------------------------------------------------------------------------------------------------------------------------------------------------|----------------|----|
|                                                                                                                                                                                                                                                                                                                                                                                                                                 | yes            | no |
| <b>Gross motor skills</b>                                                                                                                                                                                                                                                                                                                                                                                                       |                |    |
| <i>Lifts head and chest, at least 90°, supported on straightened arms.</i>                                                                                                                                                                                                                                                                                                                                                      |                |    |
| <b>Fine motor skills</b>                                                                                                                                                                                                                                                                                                                                                                                                        |                |    |
| <i>Passes objects (e.g., toys) from one hand to the other.</i>                                                                                                                                                                                                                                                                                                                                                                  |                |    |
| <b>Perception/cognition</b>                                                                                                                                                                                                                                                                                                                                                                                                     |                |    |
| <i>Objects, toys are grasped with both hands, put into the mouth, gnawed, but not looked at very intensively (explored orally and manually). Activities in the immediate environment are followed attentively.</i>                                                                                                                                                                                                              |                |    |
| <b>Language</b>                                                                                                                                                                                                                                                                                                                                                                                                                 |                |    |
| <i>Formation of rhythmic syllable chains (e.g. ge-ge-ge, mem-mem-mem, die-die-die).</i>                                                                                                                                                                                                                                                                                                                                         |                |    |
| <b>Social and emotional skills</b>                                                                                                                                                                                                                                                                                                                                                                                              |                |    |
| <i>Laughs vocally when being teased. Behaves differently with familiar people and with strangers. Is happy when another child appears.</i>                                                                                                                                                                                                                                                                                      |                |    |
| <b>Mood/affect</b>                                                                                                                                                                                                                                                                                                                                                                                                              |                |    |
| <i>The child appears content and balanced in the presence of the primary caregiver. When the primary caregiver speaks to the child or communicates with him/her non-verbally, the child remains in a positive, balanced and open mood. In reunification situations (after brief turning away/short separation), the child appears relaxed, pleased and immediately seeks eye contact with the primary caregiver.</i>            |                |    |
| <b>Contact/communication</b>                                                                                                                                                                                                                                                                                                                                                                                                    |                |    |
| <i>The child responds to address or nonverbal communication by the primary caregiver with a smile, turning of the head or spontaneous physical contact. The child spontaneously sends clear signals to the primary caregiver and seeks contact through gaze, facial expressions, gestures and sounds. In unfamiliar situations, the child makes physical or eye contact to reassure the primary caregiver.</i>                  |                |    |
| <b>Regulation/stimulation</b>                                                                                                                                                                                                                                                                                                                                                                                                   |                |    |
| <i>The child allows itself to be soothed by a primary caregiver within a short period of time by being rocked, sung to or spoken to. The child engages in interplay with the primary caregiver (e.g., with fingers or with building blocks). The child can usually self-regulate his or her feelings and tolerate mild disappointment. The child responds appropriately to loud noises, bright lights and physical stimuli.</i> |                |    |

Have there been any abnormalities in development or have any illnesses been diagnosed?

 No  Yes

If yes, please specify: \_\_\_\_\_

\_\_\_\_\_  
\_\_\_\_\_

ProBrain-D

Pseudonym: \_\_\_\_\_

**Age 12 Months**

Date of phone call: \_\_\_\_\_

Age of the patient in months: \_\_\_\_\_

|                                                                                                                                                                                                                                                                                                                                                                                                                                       | Task fulfilled |    |
|---------------------------------------------------------------------------------------------------------------------------------------------------------------------------------------------------------------------------------------------------------------------------------------------------------------------------------------------------------------------------------------------------------------------------------------|----------------|----|
|                                                                                                                                                                                                                                                                                                                                                                                                                                       | yes            | no |
| <b>Gross motor skills</b>                                                                                                                                                                                                                                                                                                                                                                                                             |                |    |
| <i>Sits freely with a straight back and secure balance control. Pulls him-/herself up to a standing position and remains standing for a few seconds. Turns independently and fluidly from supine to prone position. Crawls safely and in a coordinated manner (including stairs).</i>                                                                                                                                                 |                |    |
| <b>Fine motor skills</b>                                                                                                                                                                                                                                                                                                                                                                                                              |                |    |
| <i>Picks up small objects between thumb and pointer finger. Taps 2 blocks against each other. Points to objects with index finger. Passes objects from hand to hand. Holds pen in fist and scribbles dots and dashes.</i>                                                                                                                                                                                                             |                |    |
| <b>Perception/cognition</b>                                                                                                                                                                                                                                                                                                                                                                                                           |                |    |
| <i>Hands an object to mother/father when asked. Follows the index finger in the direction shown. Takes interest in individual objects/things in picture books. Maintains regular eye contact with caregivers.</i>                                                                                                                                                                                                                     |                |    |
| <b>Language</b>                                                                                                                                                                                                                                                                                                                                                                                                                       |                |    |
| <i>Spontaneous production of longer syllable chains. Produces double syllables (wauwau, dada). Imitates sounds (meow, mah). Can say mama, dada.</i>                                                                                                                                                                                                                                                                                   |                |    |
| <b>Emotional development/ego development</b>                                                                                                                                                                                                                                                                                                                                                                                          |                |    |
| <i>The child can distinguish between strangers and familiar people (begins to be shy with strangers). Is happy to see other children. Caresses doll or stuffed animal. Actively returns tenderness. May refuse a request by protesting. Is interested in his/her mirror image, touches it and looks into his/her eyes.</i>                                                                                                            |                |    |
| <b>Social development/independence</b>                                                                                                                                                                                                                                                                                                                                                                                                |                |    |
| <i>Follows request 'Come here!' or 'Give me!'. Imitates domestic activities, e.g., wiping, cleaning, and imitates gestures, e.g., waving or clapping hands. Rolls ball to a play partner and shows enjoyment of other children. Holds cup to drink and wants to eat by him-/herself. Helps to take off clothes and shoes, can do it partially alone.</i>                                                                              |                |    |
| <b>Learning and playing behavior</b>                                                                                                                                                                                                                                                                                                                                                                                                  |                |    |
| <i>Touches and examines things with mouth, hands, and eyes. Finds an object that was hidden under a pillow while watching (object permanence). Makes purposeful actions: e.g., puts lid on can, reaches into cup, puts something down. Begins with functional play, objects are used according to their function: e.g., plays 'eating', 'combing', 'sleeping'. Begins with representational play, actions are performed on dolls.</i> |                |    |

Have there been any abnormalities in development or have any illnesses been diagnosed?

 No  Yes

If yes, please specify: \_\_\_\_\_

\_\_\_\_\_

\_\_\_\_\_

\_\_\_\_\_

ProBrain-D

Pseudonym: \_\_\_\_\_

**Age 18 Months**

Date of phone call: \_\_\_\_\_

Age of the patient in months: \_\_\_\_\_

|                                                                                                                                                                                                | Task fulfilled |    |
|------------------------------------------------------------------------------------------------------------------------------------------------------------------------------------------------|----------------|----|
|                                                                                                                                                                                                | yes            | no |
| <b>Gross motor skills</b>                                                                                                                                                                      |                |    |
| <i>Free walking with secure balance control. Can walk up stairs with holding on.</i>                                                                                                           |                |    |
| <b>Fine motor skills</b>                                                                                                                                                                       |                |    |
| <i>Builds a tower of 2-4 blocks (showing allowed). Turns several book pages at once. Objects held by the child are handed over on demand, put into a container or taken out.</i>               |                |    |
| <b>Language</b>                                                                                                                                                                                |                |    |
| <i>Speaks approximately 10 words. Symbolic language (wau-wau), non-comprehensible child and one-word language are used for communication.</i>                                                  |                |    |
| <b>Perception/cognition</b>                                                                                                                                                                    |                |    |
| <i>Draws a line. Pulls toys behind him/her. Drinks and eats independently. Likes to look at age-appropriate picture books, points to familiar things, does role-playing with him-/herself.</i> |                |    |
| <b>Social development</b>                                                                                                                                                                      |                |    |
| <i>Simple rules and prohibitions are understood and followed to a greater or lesser extent.</i>                                                                                                |                |    |

Have there been any abnormalities in development or have any illnesses been diagnosed?

 No  Yes

If yes, please specify:

---



---



---

ProBrain-D

Pseudonym: \_\_\_\_\_

**Age 24 Months:**

Date of phone call: \_\_\_\_\_

Age of the patient in months: \_\_\_\_\_

|                                                                                                                                                                                                                                                                                                                                                                                                                                       | Task fulfilled |    |
|---------------------------------------------------------------------------------------------------------------------------------------------------------------------------------------------------------------------------------------------------------------------------------------------------------------------------------------------------------------------------------------------------------------------------------------|----------------|----|
|                                                                                                                                                                                                                                                                                                                                                                                                                                       | yes            | no |
| <b>Gross motor skills</b>                                                                                                                                                                                                                                                                                                                                                                                                             |                |    |
| <i>Child runs safely, avoiding obstacles. Walks down 3 steps at a child's pace, holding on with one hand. Squats and picks up objects. Climbs on playground equipment. Kicks ball away forcefully with foot. Can walk on tiptoes. Throws balls or toys while standing and hops (legs closed) forward without falling.</i>                                                                                                             |                |    |
| <b>Fine motor skills</b>                                                                                                                                                                                                                                                                                                                                                                                                              |                |    |
| <i>Paints flat spiral. Holds pencil for painting in fist grip. Can unwrap wrapped candy or other small objects. Turns book pages one by one. Loves to play with blocks and cups (build towers, transfer things, etc.). Can unscrew a lid.</i>                                                                                                                                                                                         |                |    |
| <b>Language</b>                                                                                                                                                                                                                                                                                                                                                                                                                       |                |    |
| <i>One-word, two-word language (at least 50 correct words). Understands and follows simple requests. Expresses through gestures or speech (shaking head or saying no) that he/she dislikes something or has his/her own ideas. Points or looks at 3 named body parts. Understands characteristics such as 'large', 'heavy', or 'cold'.</i>                                                                                            |                |    |
| <b>Perception/cognition</b>                                                                                                                                                                                                                                                                                                                                                                                                           |                |    |
| <i>Stacks 3 cubes, builds a tower of 4-6 blocks. Points to familiar objects in the picture book. Puts three cups of different sizes inside each other.</i>                                                                                                                                                                                                                                                                            |                |    |
| <b>Emotional development/ego development</b>                                                                                                                                                                                                                                                                                                                                                                                          |                |    |
| <i>Stays and plays alone for about 15 minutes, even if mom/dad is not in the room but nearby. Has interest in other children. Learns that he/she has a mind of his/her own, says 'no', gets angry. Defends his/her possessions. Calls him/herself by his/her own name. Seeks comfort when sad. Likes to play with other children, it is still more of a side by side game than with each other. Smiles after a successful action.</i> |                |    |
| <b>Social development/independence</b>                                                                                                                                                                                                                                                                                                                                                                                                |                |    |
| <i>Likes to play chase with peers. Helps with small domestic jobs (setting and clearing the table etc.). Imitates domestic chores (cleaning, ironing, mowing lawn, etc.). Takes off an open jacket and t-shirt, puts on a sweater independently. Can eat with a spoon, eats plate empty with little spills, and dries hands cursorily. Tries to pull parents somewhere.</i>                                                           |                |    |
| <b>Learning and playing behavior</b>                                                                                                                                                                                                                                                                                                                                                                                                  |                |    |
| <i>Spontaneously cares for doll or stuffed animal (begins simple role play). Interested in story in picture book and points out details. Does not give up immediately when playing: Tries to put shapes in a shape box, tries out what fits where and how (cups, blocks, etc.).</i>                                                                                                                                                   |                |    |

Have there been any abnormalities in development or have any illnesses been diagnosed?

 No  Yes

If yes, please specify:

---



---
